# Supplementary material
Source: PubMed Central journal article supplement (PMC4565847)
Supplement: jcav06p0984s1.pdf [file jcav06p0984s1.pdf]

## Supplementary material

**Table S1.** The antibodies, clones, dilutions, pretreatment conditions, and sources used for IHC.

| Antigen   | Clone      | Dilution     | Antigen Retrieval                             | Source    |
|-----------|------------|--------------|-----------------------------------------------|-----------|
| Brachyury | Polyclonal | 1:50         | HIER                                          | SantaCruz |
| Pan CK    | MNF 116    | 1:100        | P 8 min IView DAB                             | Dako      |
| EMA       | E29        | 1:200        | P 8 min IView DAB                             | Dako      |
| S-100     | Polyclonal | 1:2000       | P 12 min IView DAB                            | Dako      |
| Vimentin  | V9         | Ready to use | Dako Real Detection System<br>Peroxidase/DAB+ | Linaris   |

**Table S2.** Gene list (Illumina, TruSeq Amplicon Cancer Panel).

| Genes   | Number of Amplicons | Position (Start .. End)                                                                                                                                                                                                                                                                                                                                        |
|---------|---------------------|----------------------------------------------------------------------------------------------------------------------------------------------------------------------------------------------------------------------------------------------------------------------------------------------------------------------------------------------------------------|
| ABL1    | 5                   | 133738302..133738491, 133747476..133747664, 133748157..133748327, 133748277..133748457, 133750328..133750516                                                                                                                                                                                                                                                   |
| AKT1    | 1                   | 105246429..105246600                                                                                                                                                                                                                                                                                                                                           |
| ALK     | 2                   | 29432636..29432822, 29443667..29443836                                                                                                                                                                                                                                                                                                                         |
| APC     | 11                  | 112173887..112174071, 112174603..112174775, 112175034..112175208, 112175128..112175297, 112175216..112175386, 112175306..112175475, 112175394..112175566, 112175512..112175683, 112175630..112175799, 112175740..112175911, 112175854..112176042                                                                                                               |
| ATM     | 16                  | 108117817..108117989, 108119793..108119963, 108123513..108123683, 108137939..108138126, 108155104..108155281, 108170442..108170618, 108172391..108172571, 108173612..108173801, 108180915..108181101, 108200926..108201096, 108204651..108204823, 108205739..108205928, 108206566..108206750, 108218061..108218247, 108225562..108225751, 108236058..108236241 |
| BRAF    | 2                   | 140453093..140453267, 140481369..140481545                                                                                                                                                                                                                                                                                                                     |
| CDH1    | 3                   | 68835613..68835782, 68846109..68846283, 68847246..68847422                                                                                                                                                                                                                                                                                                     |
| CDKN2A1 | 1                   | 21971123..21971308                                                                                                                                                                                                                                                                                                                                             |
| CSF1R   | 2                   | 149433616..149433799, 149453016..149453189                                                                                                                                                                                                                                                                                                                     |
| CTNNB1  | 1                   | 41266010..41266180                                                                                                                                                                                                                                                                                                                                             |
| EGFR    | 8                   | 55211052..55211238, 55221792..55221964, 55233019..55233203, 55241649..55241827, 55242388..55242576, 55248879..55249052, 55249003..55249178, 55259486..55259662                                                                                                                                                                                                 |
| ERBB2   | 3                   | 37880191..37880361, 37880963..37881151, 37881298..37881482                                                                                                                                                                                                                                                                                                     |
| ERBB4   | 8                   | 212288912..212289100, 212530036..212530210, 212576821..212576990, 212578315..212578499, 212587115..212587285, 212589783..212589957, 212652706..212652876, 212812127..212812311                                                                                                                                                                                 |
| FBXW7   | 5                   | 153245416..153245604, 153247248..153247417, 153249338..153249520, 153250853..153251031, 153258953..153259142                                                                                                                                                                                                                                                   |
| FGFR1   | 2                   | 38282183..38282360, 38285908..38286090                                                                                                                                                                                                                                                                                                                         |
| FGFR2   | 5                   | 123258006..123258184, 123274746..123274930, 123279385..123279555, 123279471..123279640, 123279587..123279769                                                                                                                                                                                                                                                   |
| FGFR3   | 5                   | 1803538..1803712, 1806091..1806277, 1807836..1808025, 1808295..1808464, 1808921..1809105                                                                                                                                                                                                                                                                       |
| FLT3    | 4                   | 28592590..28592766, 28602295..28602464, 28608214..28608402, 28610098..28610267                                                                                                                                                                                                                                                                                 |
| GNA11   | 7                   | 3114824..3115004, 3114958..3115133, 3118802..3118989, 3119208..3119395, 3120865..3121035, 3120985..3121170, 3121121..3121304                                                                                                                                                                                                                                   |
| GNAQ    | 10                  | 80412406..80412592, 80409249..80409421, 80409335..80409510, 80409459..80409639, 80343306..80343476, 80343392..80343561, 80343504..80343689, 80336110..80336280, 80336204..80336374, 80336320..80336495                                                                                                                                                         |
| GNAS    | 1                   | 57484390..57484560                                                                                                                                                                                                                                                                                                                                             |
| HNF1A   | 2                   | 121431385..121431558, 121432042..121432221                                                                                                                                                                                                                                                                                                                     |
| HRAS    | 2                   | 533843..534021, 534251..534434                                                                                                                                                                                                                                                                                                                                 |
| IDH1    | 1                   | 209113084..209113264                                                                                                                                                                                                                                                                                                                                           |
| JAK2    | 1                   | 5073737..5073923                                                                                                                                                                                                                                                                                                                                               |
| JAK3    | 2                   | 17945666..17945840, 17947981..17948169                                                                                                                                                                                                                                                                                                                         |
| KDR     | 9                   | 55945984..55946155, 55946098..55946284, 55953777..55953965, 55955085..55955257, 55960959..55961129, 55962477..55962653, 55972936..55973106, 55979595..55979775, 55980320..55980496                                                                                                                                                                             |
| KIT     | 10                  | 55561736..55561913, 55592155..55592341, 55593342..55593512, 55593436..55593609, 55593556..55593739, 55594193..55594380, 55595493..55595675, 55597467..55597652, 55599290..55599472, 55602666..55602850                                                                                                                                                         |
| KRAS    | 3                   | 25378532..25378717, 25380245..25380427, 25398225..25398414                                                                                                                                                                                                                                                                                                     |
| MET     | 5                   | 116339614..116339792, 116340234..116340420, 116411958..116412127, 116417431..116417620, 116423385..116423555                                                                                                                                                                                                                                                   |
| MLH1    | 1                   | 37067212..37067394                                                                                                                                                                                                                                                                                                                                             |

|         |    |                                                                                                                                                                                    |
|---------|----|------------------------------------------------------------------------------------------------------------------------------------------------------------------------------------|
| MPL     | 1  | 43814982..43815163                                                                                                                                                                 |
| NOTCH1  | 2  | 139397740..139397928, 139399316..139399485                                                                                                                                         |
| NPM1    | 1  | 170837493..170837677                                                                                                                                                               |
| NRAS    | 2  | 115256500..115256680, 115258702..115258884                                                                                                                                         |
| PDGFRA  | 4  | 55140981..55141157, 55144120..55144306, 55144519..55144703, 55152012..55152184                                                                                                     |
| PIK3CA  | 7  | 178916836..178917024, 178921525..178921709, 178927906..178928082, 178936044..178936214, 178938832..178939004, 178951881..178952054, 178951999..178952184                           |
| PTEN    | 7  | 89624214..89624388, 89685275..89685459, 89711865..89712039, 89717489..89717668, 89717615..89717801, 89720684..89720870, 89720814..89720991                                         |
| PTPN11  | 2  | 112888135..112888323, 112926856..112927032                                                                                                                                         |
| RB1     | 8  | 48919156..48919336, 48923120..48923296, 48942655..48942826, 48955504..48955684, 49027112..49027288, 49033813..49033989, 49037815..49037985, 49039132..49039304                     |
| RET     | 5  | 43609048..43609226, 43609902..43610075, 43613810..43613998, 43615533..43615703, 43617388..43617564                                                                                 |
| SMAD4   | 8  | 48575131..48575301, 48581168..48581346, 48584528..48584714, 48586234..48586416, 48591796..48591982, 48593377..48593547, 48602998..48603168, 48604638..48604808                     |
| SMARCB1 | 4  | 24133939..24134126, 24143210..24143383, 24145552..24145726, 24176324..24176495                                                                                                     |
| SMO     | 5  | 128845073..128845257, 128846010..128846194, 128846348..128846536, 128850311..128850499, 128851563..128851734                                                                       |
| SRC     | 1  | 36031734..36031923                                                                                                                                                                 |
| STK11   | 4  | 1206993..1207169, 1220459..1220638, 1221232..1221407, 1223035..1223221                                                                                                             |
| TP53    | 10 | 7573977..7574147, 7576996..7577166, 7577495..7577683, 7578064..7578234, 7578156..7578325, 7578246..7578415, 7578346..7578515, 7578468..7578645, 7579324..7579507, 7579852..7580032 |
| VHL     | 3  | 10183769..10183952, 10188217..10188401, 10191450..10191634                                                                                                                         |
